# Supplementary material for: Patient and Institutional Characteristics Influence the Decision to Use Extracorporeal Cardiopulmonary Resuscitation for In‐Hospital Cardiac Arrest
Source: PubMed Central journal article supplement — J Am Heart Assoc. 2020 Apr 29;9(9):e015522. doi: 10.1161/JAHA.119.015522 (PMC7428578; doi:10.1161/jaha.119.015522), 2020-04-29
Supplement: JAH3-9-e015522-s001.pdf [file JAH3-9-e015522-s001.pdf]

# **Supplemental Material**

## **Appendix**

### **Adult Resuscitation Task Force Members:**

Anne Grossestreuer PhD; Ari Moskowitz MD; Dana Edelson MD MS; Joseph Ornato MD; Katherine Berg MD; Mary Ann Peberdy MD; Matthew Churpek MD MPH PhD; Michael Kurz MD MS-HES; Monique Anderson Starks MD MHS; Paul Chan MD MSc; Saket Girotra MBBS SM; Sarah Perman MD MSCE; Zachary Goldberger MD MS

## Data S1.

### Supplemental Methods and Results

#### Data Filtering

Sample size

|  | <b>Step</b>                                                                              | <b>N.events</b> | <b>N.admissions</b> | <b>N.eCPR</b> |
|--|------------------------------------------------------------------------------------------|-----------------|---------------------|---------------|
|  | Raw data                                                                                 | 359107          | 300649              | 1303          |
|  | Exclude all admissions with OOH_ARREST==1                                                | 344837          | 289833              | 1250          |
|  | Excluding events occurred more than 4 hrs before admission                               | 344667          | 289726              | 1250          |
|  | Excluding events occurred prior to admission (EVT_DT < ADM_DT) if ADM_DTM is missing     | 344653          | 289714              | 1250          |
|  | Excluding events with SUBJ_TY=7 (visitors..)                                             | 344159          | 289248              | 1250          |
|  | Excluding events with ILL_CAT=8 (visitors..)                                             | 344007          | 289248              | 1249          |
|  | Excluding events from hospitals that could not be matched to the hospital data           | 343870          | 288998              | 1249          |
|  | Removing all events from non-eCPR hospitals                                              | 218823          | 182764              | 1249          |
|  | Removing all events before the first eCPR of the hospital                                | 156547          | 130035              | 1249          |
|  | Keeping only the first event per admission                                               | 130035          | 130035              | 1098          |
|  | Remove patients with admission CPC =Brain death                                          | 129963          | 129963              | 1097          |
|  | Remove additional hospitals with no eCPR patients left                                   | 128809          | 128809              | 1097          |
|  | Excluding hospitals with <5 events or duration for provided events shorter than 6 months | 128619          | 128619              | 1082          |

**Table S1. Descriptive summary of hospital characteristics at hospital level.**

| <b>Variable*</b>                | <b>Summary (N=219)</b> |
|---------------------------------|------------------------|
| Hospital Beds                   |                        |
| <i>1-100</i>                    | 3 (1.4%)               |
| <i>101-199</i>                  | 16 (7.4%)              |
| <i>201-249</i>                  | 13 (6%)                |
| <i>251-299</i>                  | 26 (12%)               |
| <i>301-349</i>                  | 21 (9.7%)              |
| <i>351-499</i>                  | 57 (26.4%)             |
| <i>≥500</i>                     | 80 (37%)               |
| Annual Admissions               |                        |
| <i>100-2,499</i>                | 2 (0.9%)               |
| <i>2,500-4,999</i>              | 4 (1.9%)               |
| <i>5,000-7,499</i>              | 8 (3.7%)               |
| <i>7,500-9,999</i>              | 6 (2.8%)               |
| <i>10,000-14,999</i>            | 40 (18.5%)             |
| <i>15,000-19,999</i>            | 49 (22.7%)             |
| <i>20,000-29,999</i>            | 54 (25%)               |
| <i>30,000-39,999</i>            | 34 (15.7%)             |
| <i>≥40,000</i>                  | 19 (8.8%)              |
| Cardiac ICU Beds                |                        |
| <i>0</i>                        | 43 (20.9%)             |
| <i>1-5</i>                      | 6 (2.9%)               |
| <i>6-10</i>                     | 31 (15%)               |
| <i>11-15</i>                    | 37 (18%)               |
| <i>16-20</i>                    | 32 (15.5%)             |
| <i>21-30</i>                    | 30 (14.6%)             |
| <i>≥31</i>                      | 27 (13.1%)             |
| Cardiac ICU Beds/Total Beds (%) |                        |
| <i>0</i>                        | 43 (20.9%)             |
| <i>0.1 to &lt;2.5</i>           | 38 (18.4%)             |
| <i>2.5 to &lt;5</i>             | 76 (36.9%)             |
| <i>5 to &lt;7.5</i>             | 36 (17.5%)             |

| <b>Variable*</b>                      | <b>Summary (N=219)</b> |
|---------------------------------------|------------------------|
| 7.5 to <10                            | 7 (3.4%)               |
| ≥10                                   | 6 (2.9%)               |
| Geographic Region of US               |                        |
| <i>North / Mid Atlantic</i>           | 38 (17.4%)             |
| <i>South Atlantic and Puerto Rico</i> | 52 (23.9%)             |
| <i>North Central</i>                  | 48 (22%)               |
| <i>South Central</i>                  | 44 (20.2%)             |
| <i>Mountain/Pacific</i>               | 36 (16.5%)             |
| Intensive Services on site            | 180 (90.9%)            |
| Urban/Rural Location                  | 8 (3.8%)               |
| Teaching Status                       |                        |
| <i>Major teaching</i>                 | 71 (32.6%)             |
| <i>Minor teaching</i>                 | 121 (55.5%)            |
| <i>Non-teaching</i>                   | 26 (11.9%)             |
| Medicare Days                         |                        |
| 0                                     | 5 (2.3%)               |
| 1-1,500                               | 7 (3.2%)               |
| 1,501-5,000                           | 1 (0.5%)               |
| 5,001-20,000                          | 13 (6%)                |
| >20,000                               | 190 (88%)              |

\*Number (percent, %)

Missing values: Hospital Beds=3, Annual Admissions=3, Cardiac ICU beds=13, Cardiac ICU beds/total beds (%)=13, Geographic Region of US=1, Intensive Services on site=21, Urban/Rural Location=9, Teaching Status=1, Medicare Days=3.

ICU = intensive care unit, US = United States

**Table S2. Hospital characteristics by ECPR Available and Non ECPR Available\*.**

| Variable†         | Non ECPR Available*         | ECPR Available           | P-value |
|-------------------|-----------------------------|--------------------------|---------|
|                   | Hospital<br>Dropped (N=594) | Hospital<br>Kept (N=219) |         |
| Hospital Beds     |                             |                          | <0.001  |
| 1-100             | 88 (15.5%)                  | 3 (1.4%)                 | -       |
| 101-199           | 161 (28.3%)                 | 16 (7.4%)                | -       |
| 201-249           | 63 (11.1%)                  | 13 (6%)                  | -       |
| 251-299           | 50 (8.8%)                   | 26 (12%)                 | -       |
| 301-349           | 52 (9.2%)                   | 21 (9.7%)                | -       |
| 351-499           | 73 (12.9%)                  | 57 (26.4%)               | -       |
| ≥500              | 81 (14.3%)                  | 80 (37%)                 | -       |
| Annual Admissions |                             |                          | <0.001  |
| 100-2,499         | 37 (6.5%)                   | 2 (0.9%)                 | -       |
| 2,500-4,999       | 81 (14.3%)                  | 4 (1.9%)                 | -       |
| 5,000-7,499       | 99 (17.4%)                  | 8 (3.7%)                 | -       |
| 7,500-9,999       | 61 (10.7%)                  | 6 (2.8%)                 | -       |
| 10,000-14,999     | 106 (18.7%)                 | 40 (18.5%)               | -       |
| 15,000-19,999     | 78 (13.7%)                  | 49 (22.7%)               | -       |
| 20,000-29,999     | 59 (10.4%)                  | 54 (25%)                 | -       |
| 30,000-39,999     | 27 (4.8%)                   | 34 (15.7%)               | -       |
| ≥40,000           | 20 (3.5%)                   | 19 (8.8%)                | -       |
| Cardiac ICU Beds  |                             |                          | <0.001  |
| 0                 | 279 (57.5%)                 | 43 (20.9%)               | -       |
| 1-5               | 13 (2.7%)                   | 6 (2.9%)                 | -       |
| 6-10              | 63 (13%)                    | 31 (15%)                 | -       |
| 11-15             | 45 (9.3%)                   | 37 (18%)                 | -       |
| 16-20             | 30 (6.2%)                   | 32 (15.5%)               | -       |
| 21-30             | 35 (7.2%)                   | 30 (14.6%)               | -       |

| Variable†                          | Non ECPR Available*         | ECPR Available           | P-value |
|------------------------------------|-----------------------------|--------------------------|---------|
|                                    | Hospital<br>Dropped (N=594) | Hospital<br>Kept (N=219) |         |
| ≥31                                | 20 (4.1%)                   | 27 (13.1%)               | -       |
| Cardiac ICU Beds/Total Beds<br>(%) |                             |                          | <0.001  |
| 0                                  | 279 (57.5%)                 | 43 (20.9%)               | -       |
| 0.1 to <2.5                        | 58 (12%)                    | 38 (18.4%)               | -       |
| 2.5 to <5                          | 93 (19.2%)                  | 76 (36.9%)               | -       |
| 5 to <7.5                          | 32 (6.6%)                   | 36 (17.5%)               | -       |
| 7.5 to <10                         | 10 (2.1%)                   | 7 (3.4%)                 | -       |
| ≥10                                | 13 (2.7%)                   | 6 (2.9%)                 | -       |
| Geographic Region of US            |                             |                          | 0.81    |
| North / Mid Atlantic               | 92 (15.9%)                  | 38 (17.4%)               | -       |
| South Atlantic and Puerto Rico     | 139 (24.1%)                 | 52 (23.9%)               | -       |
| North Central                      | 127 (22%)                   | 48 (22%)                 | -       |
| South Central                      | 104 (18%)                   | 44 (20.2%)               | -       |
| Mountain/Pacific                   | 115 (19.9%)                 | 36 (16.5%)               | -       |
| Site in GWTG_R                     | 594 (100%)                  | 219 (100%)               | 1.00    |
| Intensive Services on site         | 347 (75.8%)                 | 180 (90.9%)              | <0.001  |
| Urban/Rural Location               |                             |                          | <0.001  |
| Urban                              | 483 (87%)                   | 202 (96.2%)              | -       |
| Rural                              | 72 (13%)                    | 8 (3.8%)                 | -       |
| Teaching Status                    |                             |                          | <0.001  |
| Non-teaching                       | 192 (33.5%)                 | 26 (11.9%)               | -       |
| Major teaching                     | 83 (14.5%)                  | 71 (32.6%)               | -       |
| Minor teaching                     | 298 (52%)                   | 121 (55.5%)              | -       |
| Medicare Days                      |                             |                          | <0.001  |

| Variable†    | Non ECPR Available*         | ECPR Available           | P-value |
|--------------|-----------------------------|--------------------------|---------|
|              | Hospital<br>Dropped (N=594) | Hospital<br>Kept (N=219) |         |
| 0            | 33 (5.8%)                   | 5 (2.3%)                 | -       |
| 1-1,500      | 14 (2.5%)                   | 7 (3.2%)                 | -       |
| 1,501-5,000  | 22 (3.9%)                   | 1 (0.5%)                 | -       |
| 5,001-20,000 | 188 (33%)                   | 13 (6%)                  | -       |
| >20,000      | 313 (54.9%)                 | 190 (88%)                | -       |

\* ECPR occurred at some “Non-ECPR available” hospitals. “Non-ECPR available” was defined for the purposes of this analysis as hospitals had done no ECPR cases, or hospitals that had submitted < 5 cardiac arrests events or <6 months of data.

† Number (%)

ECPR = extracorporeal cardiopulmonary resuscitation, CCPR = conventional cardiopulmonary resuscitation, ICU: Intensive Care Unit; GWTG-R: Get With The Guidelines—Resuscitation; US: United States

Missing values by group: Hospital Beds=26/3, Annual Admissions=26/3, Cardiac ICU beds=109/13, Cardiac ICU beds/total beds (%)=109/13, Geographic Region of US =17/1, Intensive Services on site=136/21, Urban/Rural Location=39/9, Teaching Status=21/1, Medicare Days=24/3.



**Table S3. Patient characteristics by ECPR Available vs. Non ECPR Available\* hospitals†.**

| Variable‡                  | Non ECPR                                  | ECPR Available              | P-value§ |
|----------------------------|-------------------------------------------|-----------------------------|----------|
|                            | Available* Hospital<br>Dropped (N=110775) | Hospital<br>Kept (N=178223) |          |
| Age                        |                                           |                             | <0.001   |
| <40                        | 6270 (5.7%)                               | 13590 (7.6%)                | -        |
| 40-59                      | 25794 (23.3%)                             | 46325 (26%)                 | -        |
| ≥60                        | 78711 (71.1%)                             | 118308 (66.4%)              | -        |
| Male Sex                   | 64488 (58.2%)                             | 103102 (57.9%)              | 0.027    |
| Race                       |                                           |                             | <0.001   |
| White                      | 77230 (70.1%)                             | 120863 (68%)                | -        |
| Black                      | 21619 (19.6%)                             | 40311 (22.7%)               | -        |
| Other                      | 11281 (10.2%)                             | 16593 (9.3%)                | -        |
| Hispanic Ethnicity         | 6330 (5.7%)                               | 9623 (5.4%)                 | 0.86     |
| Weight(kg)                 | 77 (63.5, 93)                             | 78 (64.5, 95)               | 0.09     |
| Pre-Existing Condition     |                                           |                             |          |
| None                       | 8452 (7.7%)                               | 9547 (5.4%)                 | 0.003    |
| Preceding Hypoperfusion    | 25640 (23.2%)                             | 49340 (27.8%)               | <0.001   |
| CVA or Neurologic Disorder | 19573 (17.7%)                             | 36387 (20.5%)               | <0.001   |
| CHF                        | 31160 (28.2%)                             | 51883 (29.2%)               | <0.001   |
| Diabetes Mellitus          | 34509 (31.2%)                             | 57006 (32.1%)               | <0.001   |
| Hepatic Insufficiency      | 7687 (7%)                                 | 14067 (7.9%)                | <0.001   |
| Major Trauma               | 3403 (3.1%)                               | 9015 (5.1%)                 | 0.15     |
| Cancer                     | 12372 (11.2%)                             | 21471 (12.1%)               | <0.001   |
| History of MI              | 15457 (14%)                               | 27566 (15.5%)               | <0.001   |
| MI this Hospitalization    | 16247 (14.7%)                             | 27793 (15.6%)               | <0.001   |
| Renal Insufficiency        | 36737 (33.3%)                             | 61992 (34.9%)               | <0.001   |
| Respiratory Insufficiency  | 44263 (40.1%)                             | 78969 (44.4%)               | 0.013    |

| Variable‡                                  | Non ECPR                                  | ECPR Available              | P-value§ |
|--------------------------------------------|-------------------------------------------|-----------------------------|----------|
|                                            | Available* Hospital<br>Dropped (N=110775) | Hospital<br>Kept (N=178223) |          |
| <i>Sepsis</i>                              | 18181 (16.5%)                             | 29963 (16.9%)               | <0.001   |
| Admission CPC                              |                                           |                             | <0.001   |
| <i>CPC 1: Good cerebral performance</i>    | 46289 (57.1%)                             | 82750 (59.5%)               |          |
| <i>CPC 2: Moderate cerebral disability</i> | 19871 (24.5%)                             | 30388 (21.9%)               |          |
| <i>CPC 3: Severe cerebral disability</i>   | 10036 (12.4%)                             | 15698 (11.3%)               |          |
| <i>CPC 4: Coma or vegetative state</i>     | 4716 (5.8%)                               | 10132 (7.3%)                |          |
| <i>CPC 5: Brain death</i>                  | 102 (0.1%)                                | 99 (0.1%)                   |          |

\*ECPR occurred at some “Non-ECPR capable” hospitals. “Non-ECPR capable” was defined for the purposes of this analysis as hospitals had done no ECPR cases, or hospitals that had submitted < 5 cardiac arrests events or <6 months of data.

†Exclusion criteria like keeping events after 1<sup>st</sup> ECPR, dropping brain dead patients were not applied here.

‡Number (percent, %)

§Type 3 p values from mixed effects logistic regression model, with hospitals included as a random effect.

||Median (interquartile range, IQR)

# CPC Defined as: CPC 1: Good cerebral performance, CPC 2: Moderate cerebral disability, CPC 3: Severe cerebral disability, CPC 4: Coma or vegetative state

ECPR = extracorporeal cardiopulmonary resuscitation, CCPR = conventional cardiopulmonary resuscitation, CVA = cerebrovascular accident, CHF = congestive heart failure, MI = myocardial infarction, CPC = cerebral performance category

Missing values by group: Sex=19/10, Race=645/456, Weight(kg)=50246/85640, Pre-existing condition: None=338/479, Preceding hypoperfusion=338/479, -CVA or Neurologic Disorder=338/479, -CHF=338/479, -Diabetes Mellitus=338/479, -Hepatic Insufficiency=338/479, -Major Trauma=338/479, -

Cancer =338/479, -History of MI=338/479, -MI this Hospitalization=338/479, -Renal  
Insufficiency=338/479, -Respiratory Insufficiency=338/479, -Sepsis=338/479, Admission  
CPC=29761/39156.

**Table S4. Summary of #ECPR, #CCPR, and their ratio for 23 hospitals that had eCPR cases in 2010.**

| <b>Year</b>     | <b>#ECPR</b> | <b>#CCPR</b>  | <b>#ECPR/#CCPR ratio</b> | <b>Fraction of all ECPRs represented by these 23 hospitals</b> |
|-----------------|--------------|---------------|--------------------------|----------------------------------------------------------------|
| 2010            | 48           | 2327          | 0.021                    | 1                                                              |
| 2011            | 20           | 2872          | 0.007                    | 0.645                                                          |
| 2012            | 20           | 2607          | 0.008                    | 0.357                                                          |
| 2013            | 32           | 2675          | 0.012                    | 0.36                                                           |
| 2014            | 42           | 2663          | 0.016                    | 0.368                                                          |
| 2015            | 34           | 2608          | 0.013                    | 0.296                                                          |
| 2016            | 48           | 2717          | 0.018                    | 0.425                                                          |
| 2017            | 30           | 2506          | 0.012                    | 0.288                                                          |
| <del>2018</del> | <del>0</del> | <del>49</del> | <del>0</del>             | <del>0</del>                                                   |

**Table S5. Comparing ECPR patient characteristics between two eras.**

| Variable*                  | 2000-2008<br>(N=357) | 2009-2018<br>(N=725) | P -value† |
|----------------------------|----------------------|----------------------|-----------|
| Age                        |                      |                      | 0.95      |
| <40                        | 47 (13.2%)           | 119 (16.4%)          | -         |
| 40-59                      | 113 (31.7%)          | 242 (33.4%)          | -         |
| ≥60                        | 197 (55.2%)          | 364 (50.2%)          | -         |
| Sex                        |                      |                      | 0.24      |
| Male                       | 212 (59.4%)          | 454 (62.6%)          | -         |
| Female                     | 145 (40.6%)          | 271 (37.4%)          | -         |
| Race                       |                      |                      | 0.30      |
| White                      | 272 (76.6%)          | 527 (72.8%)          | -         |
| Black                      | 42 (11.8%)           | 126 (17.4%)          | -         |
| Other                      | 41 (11.5%)           | 71 (9.8%)            | -         |
| Hispanic Ethnicity         | 18 (5%)              | 37 (5.1%)            | 0.76      |
| Weight(kg) ‡               | 80.0 (67.5, 95.5)    | 80.0 (65.6, 96.9)    | 0.52      |
| Pre-existing condition     |                      |                      |           |
| None                       | 16 (4.5%)            | 70 (9.7%)            | 0.39      |
| Preceding hypoperfusion    | 166 (46.5%)          | 304 (42.1%)          | 0.78      |
| CVA or Neurologic Disorder | 32 (9%)              | 68 (9.4%)            | 0.42      |
| CHF                        | 124 (34.7%)          | 242 (33.5%)          | 0.57      |
| Diabetes Mellitus          | 61 (17.1%)           | 185 (25.6%)          | 0.29      |
| Hepatic Insufficiency      | 12 (3.4%)            | 41 (5.7%)            | 0.23      |
| Major Trauma               | 14 (3.9%)            | 26 (3.6%)            | 0.49      |
| Cancer                     | 12 (3.4%)            | 30 (4.2%)            | 0.62      |
| History of MI              | 99 (27.7%)           | 130 (18%)            | 0.036     |
| MI this Hospitalization    | 130 (36.4%)          | 159 (22%)            | 0.16      |
| Renal Insufficiency        | 55 (15.4%)           | 189 (26.2%)          | 0.001     |
| Respiratory Insufficiency  | 107 (30%)            | 336 (46.5%)          | <0.001    |
| Sepsis                     | 17 (4.8%)            | 70 (9.7%)            | 0.08      |

| <b>Variable*</b>                                          | <b>2000-2008<br/>(N=357)</b> | <b>2009-2018<br/>(N=725)</b> | <b>P -value†</b> |
|-----------------------------------------------------------|------------------------------|------------------------------|------------------|
| Admission CPC§                                            |                              |                              | 0.44             |
| <i>CPC 1: Good cerebral performance</i>                   | 224 (76.2%)                  | 443 (79.1%)                  | -                |
| <i>CPC 2: Moderate cerebral disability</i>                | 41 (13.9%)                   | 47 (8.4%)                    | -                |
| <i>CPC 3: Severe cerebral disability</i>                  | 16 (5.4%)                    | 23 (4.1%)                    | -                |
| <i>CPC 4: Coma or vegetative state</i>                    | 13 (4.4%)                    | 47 (8.4%)                    | -                |
| Duration between Admission and Arrest:                    |                              |                              | 0.52             |
| <24h                                                      | 347 (97.2%)                  | 697 (96.1%)                  | -                |
| 24 - <48h                                                 | 8 (2.2%)                     | 21 (2.9%)                    | -                |
| 48h - 1wk                                                 | 1 (0.3%)                     | 5 (0.7%)                     | -                |
| ≥1wk                                                      | 1 (0.3%)                     | 2 (0.3%)                     | -                |
| Devices in place at arrest                                |                              |                              |                  |
| <i>Mechanical Ventilation</i>                             | 205 (57.4%)                  | 351 (48.5%)                  | 0.27             |
| <i>Invasive Airway</i>                                    | 197 (55.2%)                  | 334 (46.1%)                  | 0.38             |
| <i>Arterial Line</i>                                      | 162 (45.4%)                  | 316 (43.6%)                  | 0.44             |
| Time of Day of arrest                                     |                              |                              |                  |
| 7am-3pm                                                   | 170 (50.4%)                  | 330 (47.3%)                  | 0.72             |
| 3pm-11pm                                                  | 118 (35%)                    | 240 (34.4%)                  | -                |
| 11pm-7am                                                  | 49 (14.5%)                   | 128 (18.3%)                  | -                |
| Day of Week                                               | 53 (14.8%)                   | 133 (18.3%)                  | 0.16             |
| Arrest location                                           |                              |                              | 0.29             |
| <i>General inpatient  </i>                                | 29 (8.1%)                    | 71 (9.8%)                    | -                |
| <i>Ambulatory/outpatient**</i>                            | 7 (2%)                       | 9 (1.2%)                     | -                |
| <i>Cardiac/Coronary Unit</i>                              | 16 (4.5%)                    | 87 (12%)                     | -                |
| <i>ICU</i>                                                | 129 (36.1%)                  | 273 (37.7%)                  | -                |
| <i>OR + procedural area + Cardiac catheterization lab</i> | 163 (45.7%)                  | 258 (35.6%)                  | -                |
| <i>Emergency Department</i>                               | 13 (3.6%)                    | 27 (3.7%)                    | -                |
| Illness Category:                                         |                              |                              | 0.35             |
| <i>Medical-Noncardiac</i>                                 | 35 (9.8%)                    | 99 (13.7%)                   | -                |

|                                             | <b>2000-2008</b> | <b>2009-2018</b> |                  |
|---------------------------------------------|------------------|------------------|------------------|
| <b>Variable*</b>                            | <b>(N=357)</b>   | <b>(N=725)</b>   | <b>P -value†</b> |
| <i>Medical-Cardiac</i>                      | 102 (28.6%)      | 232 (32%)        | -                |
| <i>Surgical-Cardiac</i>                     | 190 (53.2%)      | 338 (46.6%)      | -                |
| <i>Surgical-Noncardiac</i>                  | 30 (8.4%)        | 56 (7.7%)        | -                |
| Witnessed                                   | 346 (96.9%)      | 703 (97%)        | 0.89             |
| Hospital resuscitation activated            | 143 (40.1%)      | 340 (46.9%)      | 0.58             |
| Condition of 1st assessment                 |                  |                  | 0.54             |
| <i>Poor perfusion, lost pulses</i>          | 27 (7.6%)        | 63 (8.7%)        | -                |
| <i>Poor perfusion, never pulseless</i>      | 6 (1.7%)         | 18 (2.5%)        | -                |
| <i>Pulseless</i>                            | 324 (90.8%)      | 644 (88.8%)      | -                |
| Presenting rhythm status                    |                  |                  | 0.08             |
| <i>Asystole</i>                             | 88 (26.7%)       | 126 (18.6%)      | -                |
| <i>PEA</i>                                  | 106 (32.2%)      | 297 (43.7%)      | -                |
| <i>Pulseless Ventricular Tachycardia</i>    | 29 (8.8%)        | 64 (9.4%)        | -                |
| <i>Ventricular Fibrillation</i>             | 73 (22.2%)       | 111 (16.3%)      | -                |
| <i>Palpable pulse initially</i>             | 33 (10%)         | 81 (11.9%)       | -                |
| First Rhythm                                |                  |                  | 0.62             |
| <i>Accelerated idioventricular rhythm</i>   | 0 (0%)           | 2 (2.5%)         | -                |
| <i>Bradycardia</i>                          | 11 (33.3%)       | 44 (54.3%)       | -                |
| <i>Pacemaker</i>                            | 9 (27.3%)        | 7 (8.6%)         | -                |
| <i>Sinus (including sinus tachycardia)</i>  | 3 (9.1%)         | 10 (12.3%)       | -                |
| <i>Supraventricular tachyarrhythmia</i>     | 1 (3%)           | 0 (0%)           | -                |
| <i>Unknown</i>                              | 4 (12.1%)        | 11 (13.6%)       | -                |
| <i>Ventricular Tachycardia with a pulse</i> | 5 (15.2%)        | 7 (8.6%)         | -                |
| Any VF/VT                                   | 195 (54.6%)      | 393 (54.2%)      | 0.74             |
| Number of defibrillations‡                  | 3.0 (2.0, 6.0)   | 3.0 (2.0, 6.0)   | 0.74             |
| Received compressions                       | 344 (96.4%)      | 710 (97.9%)      | 0.35             |
| Compression Method                          |                  |                  |                  |
| <i>Manual</i>                               | 98 (92.5%)       | 657 (92.5%)      | 0.26             |

|                                      | <b>2000-2008</b>  | <b>2009-2018</b>  |                  |
|--------------------------------------|-------------------|-------------------|------------------|
| <b>Variable*</b>                     | <b>(N=357)</b>    | <b>(N=725)</b>    | <b>P -value†</b> |
| <i>Mechanical</i>                    | 101 (95.3%)       | 97 (13.7%)        | <0.001           |
| <i>Open Cardiac Massage</i>          | 16 (15.1%)        | 138 (19.4%)       | 0.52             |
| Epi boluses before pulseless‡        | 3.0 (1.8, 5.0)    | 4.0 (2.0, 6.0)    | 0.64             |
| Epi boluses after pulseless‡         | 4.0 (2.0, 5.0)    | 5.0 (3.0, 9.0)    | 0.004            |
| Any ROSC                             | 257 (72.8%)       | 604 (83.4%)       | 0.12             |
| Total duration before durable ROSC ‡ | 39.0 (17.2, 85.0) | 35.5 (17.0, 65.0) | 0.046            |
| Induced Hypothermia                  | 26 (11.4%)        | 88 (13.2%)        | 0.49             |

\* Number (percent, %)

† Type 3 p values from mixed effects logistic regression model, with hospitals included as a random effect.

‡ Median (interquartile range, IQR)

§ CPC Defined as: CPC 1: Good cerebral performance, CPC 2: Moderate cerebral disability, CPC 3: Severe cerebral disability, CPC 4: Coma or vegetative state

|| Includes adults arresting in the newborn unit

\*\* Includes rehabilitation and other

ECPR = extracorporeal cardiopulmonary resuscitation, CCPR = conventional cardiopulmonary resuscitation, CVA = cerebrovascular accident, CHF = congestive heart failure, MI = myocardial infarction, CPC = cerebral performance category, h = hours, wk = week, VF/VT = ventricular fibrillation/ventricular tachycardia, Epi = epinephrine, ROSC = return of spontaneous circulation

Missing values by group: Race=2/1, Weight(kg)=38/521, Pre-existing condition-None=0/3, -Preceding hypoperfusion=0/3, -CVA or Neurologic Disorder=0/3, -CHF=0/3, -Diabetes Mellitus=0/3, -Hepatic Insufficiency=0/3, -Major Trauma=0/3, -Cancer =0/3, -History of MI=0/3, -MI this Hospitalization=0/3, -Renal Insufficiency=0/3, -Respiratory Insufficiency=0/3, -Sepsis=0/3, Admission CPC=63/165, Devices - Mechanical Ventilation=0/1, Devices - Invasive Airway=0/1, Devices - Arterial Line=0/1, Time of Day of



arrest=20/27, Presenting rhythm status=28/46, First Rhythm=324/644, Number of defibrillations=204/364, Compression method-Manual=251/15, Compression method-Mechanical=251/15, Compression method-Open Cardiac Massage=251/15, Epi boluses before pulseless=349/676, Epi boluses after pulseless=165/176, Any ROSC=4/1, Total duration before durable ROSC=71/91, Induced Hypothermia=128/56.

**Figure S1. Study enrollment flowchart.**

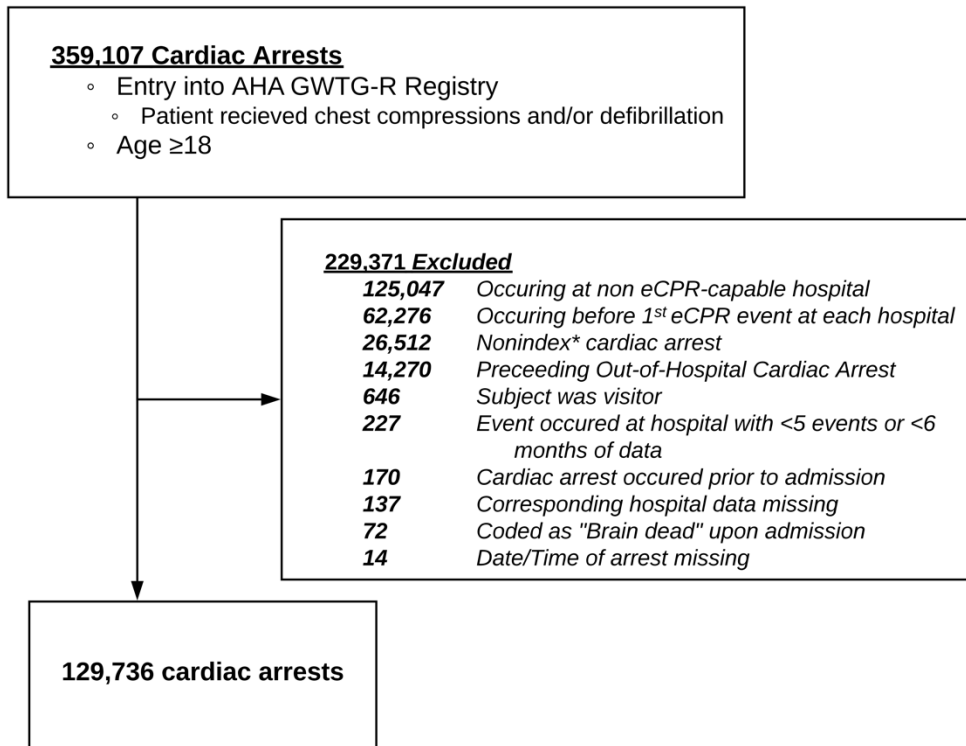

eCPR = extracorporeal cardiopulmonary resuscitation

**Figure S2. Number and percent of ECPR cases over time among hospitals that had an ECPR program in 2010.**

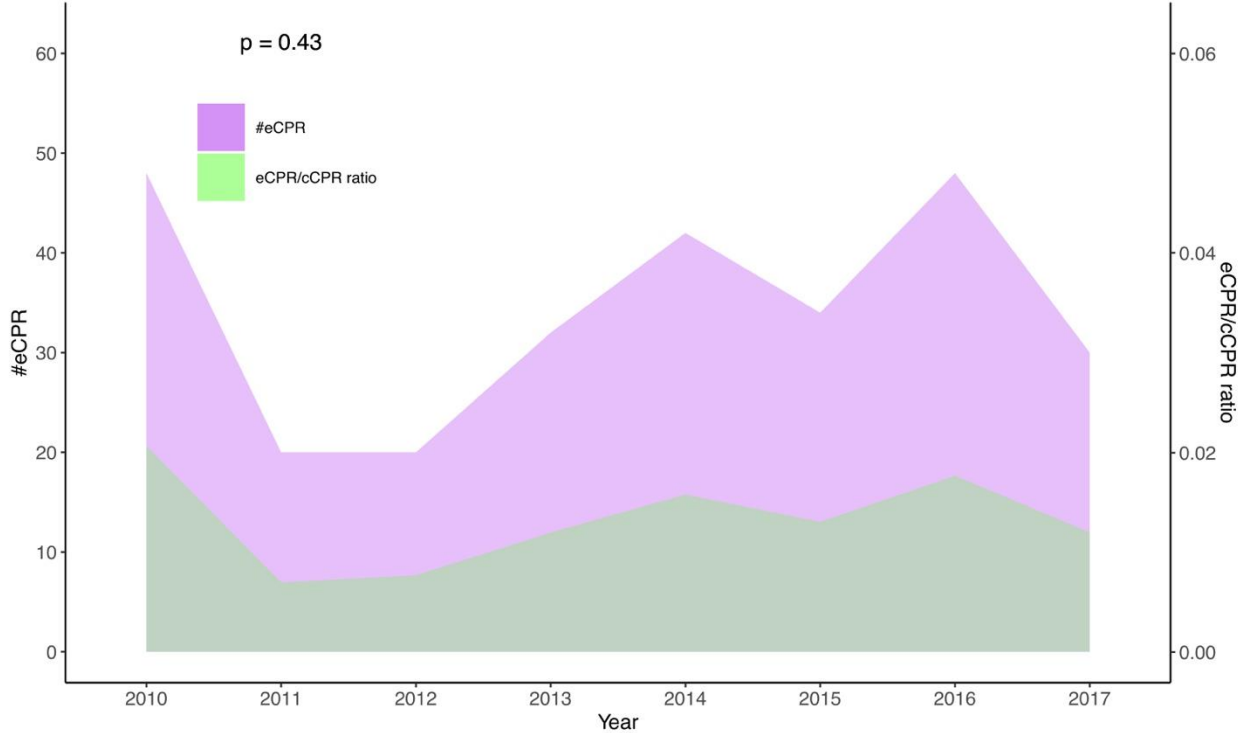

Data from 2018 incomplete so dropped from Figure S2. (See Table S5)

Cochran Armitage trend p value reported.

ECPR = extracorporeal cardiopulmonary resuscitation, CCPR = conventional cardiopulmonary resuscitation
